# Supplementary material for: Enhanced lithographic performance of polymer-bound PAG photoresists synthesized via RAFT polymerization
Source: Royal Society of Chemistry journal article supplement (doi:10.1039/d4py01271b), 2025-01-01
Supplement: d4py01271b1.pdf [file d4py01271b1.pdf]

## Supplementary Information

### Enhanced Lithographic Performance of Polymer-Bound PAG Photoresists Synthesized via RAFT Polymerization

Nan Qin<sup>a</sup>, Na Li<sup>b</sup>, Xiang Gao<sup>\*a</sup>

<sup>a</sup>The State Key Laboratory of Chemical Engineering, College of Chemical and Biological Engineering, Zhejiang University, Hangzhou, 310027, China

<sup>b</sup>Hangzhou Xianyan Technology Co., Ltd., Hangzhou, 311121, China

\* Corresponding author. E-mail address: gaox@zju.edu.cn

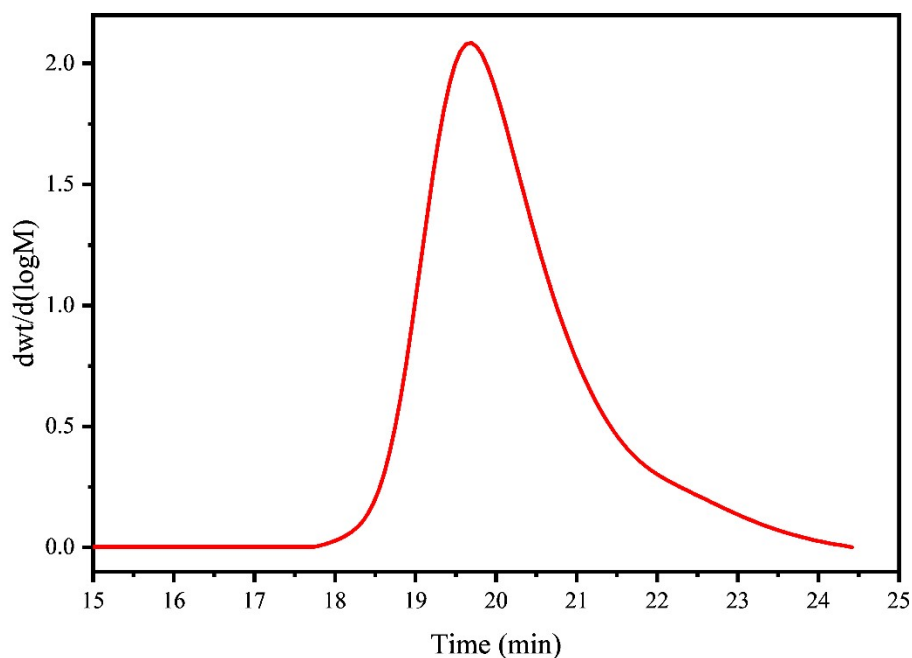

**Figure S1** GPC image of PTIMV<sub>0</sub>

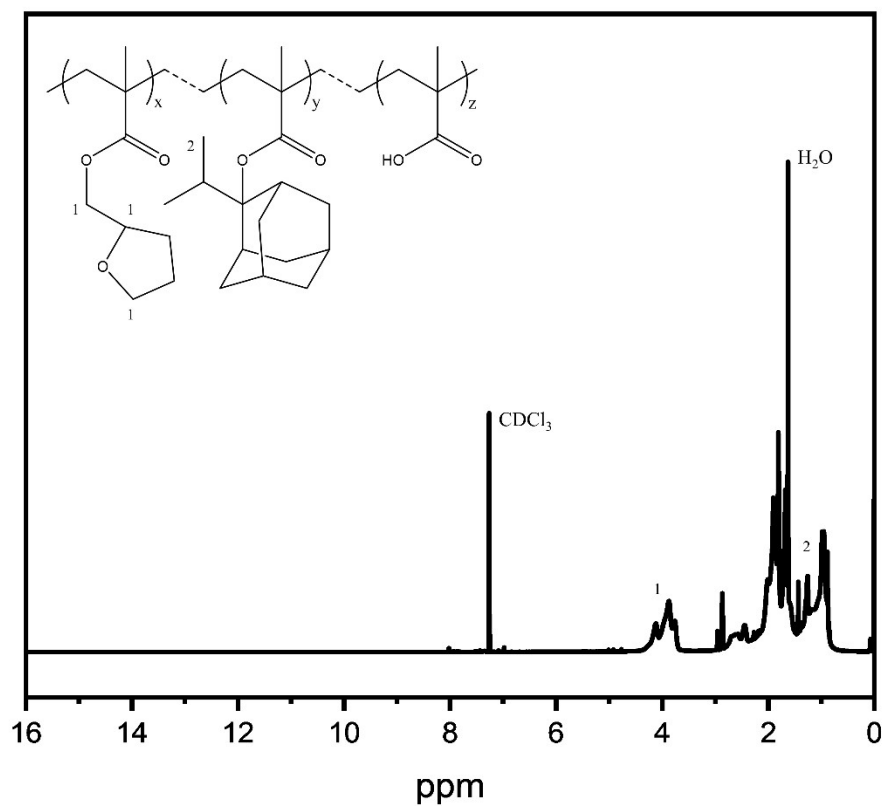

Figure S2  $^1\text{H}$  NMR spectra of PTIMV<sub>0</sub>

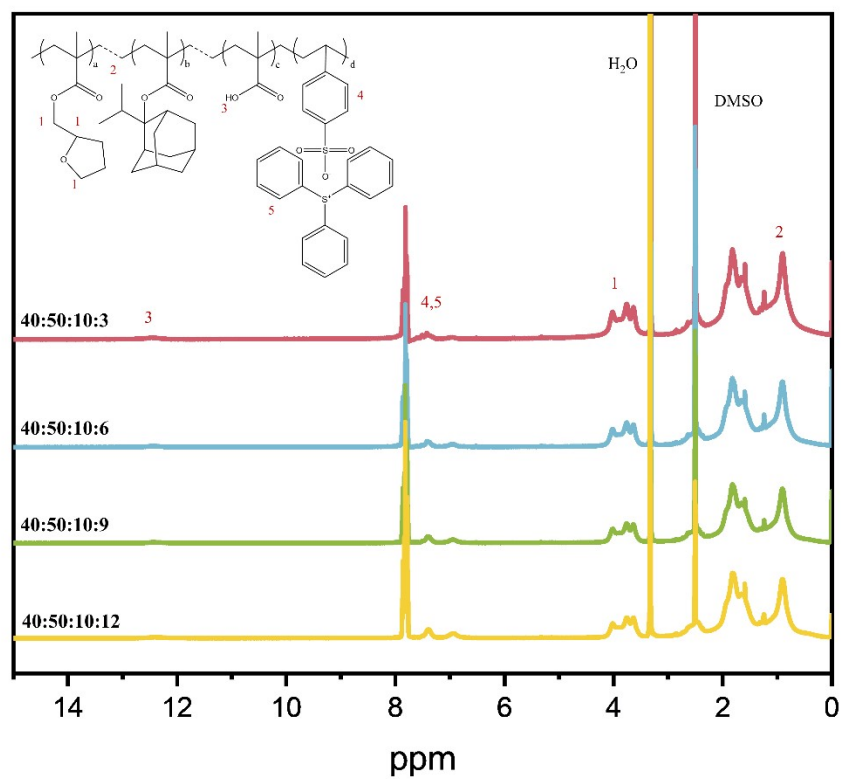

Figure S3  $^1\text{H}$  NMR spectra of PTIMVs
